# Supplementary material
Source: PubMed Central journal article supplement (PMC6647042)
Supplement: DC190412SupplementaryData.pdf [file DC190412SupplementaryData.pdf]

SUPPLEMENTARY DATA

**Supplementary Table S1.** Top food sources of linoleic acid, arachidonic acid, and *trans* fats

|              | <b>NHS 1984*</b>          |      | <b>NHSII 1991</b>         |      | <b>HPFS 1986</b>          |      |
|--------------|---------------------------|------|---------------------------|------|---------------------------|------|
| LA           | Mayonnaise                | 14.6 | Mayonnaise                | 16.0 | Mayonnaise                | 13.6 |
|              | Margarine                 | 9.8  | Margarine                 | 8.5  | Margarine                 | 8.0  |
|              | Italian salad dressing    | 9.1  | Potato chips              | 7.6  | Peanut                    | 6.2  |
|              | Potato chips              | 5.5  | Spaghetti sauce           | 6.1  | Potato chips              | 5.6  |
|              | Peanut                    | 4.7  | Chicken without skin      | 5.1  | Peanut butter             | 5.0  |
| AA           | Chicken without skin      | 20.7 | Chicken without skin      | 25.0 | Eggs                      | 26.0 |
|              | Eggs                      | 17.1 | Turkey                    | 23.1 | Chicken with skin         | 10.6 |
|              | Chicken with skin         | 13.8 | Chicken with skin         | 9.2  | Tuna                      | 7.8  |
|              | Beef                      | 8.2  | Eggs                      | 8.1  | Chicken without skin      | 7.2  |
|              | Ham                       | 8.1  | Ham                       | 6.5  | Mayonnaise                | 5.5  |
| <i>Trans</i> |                           |      |                           |      |                           |      |
| fats         | Margarine                 | 16.7 | Fried food away from home | 20.8 | Beef                      | 10.9 |
|              | Beef                      | 9.6  | French fries              | 8.6  | French fries              | 9.0  |
|              | Italian salad dressing    | 5.9  | Margarine                 | 8.3  | Italian salad dressing    | 6.5  |
|              | French fries              | 4.8  | Danish pastry             | 6.4  | Ham                       | 4.9  |
|              | Oatmeal cookies           | 4.4  | Chocolate chips           | 4.8  | Sandwich beef             | 4.5  |
|              | <b>NHS 1994</b>           |      | <b>NHSII 1999</b>         |      | <b>HPFS 1998</b>          |      |
| LA           | Margarine                 | 9.8  | Olive oil                 | 10.5 | Mayonnaise                | 4.8  |
|              | Mayonnaise                | 8.0  | Potato chips              | 5.1  | Olive oil                 | 4.7  |
|              | Chicken without skin      | 6.5  | Mayonnaise                | 4.8  | Mixed nuts                | 4.7  |
|              | Tomato sauce              | 5.9  | Chicken without skin      | 3.8  | Chicken without skin      | 4.4  |
|              | Potato chips              | 4.6  | Margarine                 | 3.7  | Potato chips              | 4.0  |
| AA           | Chicken without skin      | 37.0 | Chicken without skin      | 23.8 | Eggs                      | 18.0 |
|              | Eggs                      | 9.8  | Chicken sandwich          | 14.6 | Dark meat fish            | 8.4  |
|              | Chicken with skin         | 9.1  | Eggs                      | 12.3 | Chicken without skin      | 5.7  |
|              | Lean beef patty           | 4.5  | Chicken with skin         | 6.9  | Tuna                      | 5.0  |
|              | Pork                      | 4.3  | Pork                      | 5.4  | Cheddar cheese            | 4.2  |
| <i>Trans</i> |                           |      |                           |      |                           |      |
| fats         | Fried food away from home | 12.8 | French fries              | 14.2 | Potato chips              | 11.2 |
|              | Cracker                   | 9.1  | Beef                      | 10.9 | Beef                      | 9.8  |
|              | Danish pastry             | 8.2  | Fried food away from home | 6.0  | Fried food away from home | 9.4  |
|              | Margarine                 | 7.9  | Cracker                   | 5.1  | Cracker                   | 8.2  |

SUPPLEMENTARY DATA

|                      | Chocolate chips                            | 6.6  | Cheese(other than cottage or cream cheese) | 4.8  | Danish pastry                              | 4.8  |
|----------------------|--------------------------------------------|------|--------------------------------------------|------|--------------------------------------------|------|
|                      | <b>NHS 2010</b>                            |      | <b>NHSII 2011</b>                          |      | <b>HPFS 2010</b>                           |      |
| LA                   | Walnuts                                    | 9.9  | Walnuts                                    | 8.9  | Walnuts                                    | 8.7  |
|                      | Italian salad dressing                     | 6.4  | Mixed nuts                                 | 6.5  | Mixed nuts                                 | 6.0  |
|                      | Mayonnaise                                 | 5.6  | Italian salad dressing                     | 5.8  | Peanut                                     | 5.5  |
|                      | Mixed nuts                                 | 4.8  | Olive oil                                  | 4.6  | Italian salad dressing                     | 5.0  |
|                      | Peanut butter                              | 4.7  | French fries                               | 4.4  | French fries                               | 4.7  |
| AA                   | Dark meat fish                             | 22.6 | Dark meat fish                             | 21.3 | Dark meat fish                             | 31.6 |
|                      | Eggs                                       | 17.6 | Chicken without skin                       | 17.5 | Eggs                                       | 14.6 |
|                      | Fish oil                                   | 4.8  | Eggs                                       | 13.9 | Beef                                       | 4.2  |
|                      | Chicken without skin                       | 4.6  | Chicken sandwich                           | 10.9 | Fish oil                                   | 3.6  |
|                      | Beef as main dish                          | 4.1  | Chicken with skin                          | 5.4  | Chicken with skin                          | 3.1  |
| <i>Trans</i><br>fats | Cheese(other than cottage or cream cheese) | 7.6  | Cheese(other than cottage or cream cheese) | 8.8  | French fries                               | 11.1 |
|                      | Beef                                       | 5.6  | Beef                                       | 6.6  | Fried food away from home                  | 9.0  |
|                      | Danish pastry                              | 4.9  | Lean beef patty                            | 4.7  | Apple pie                                  | 7.0  |
|                      | Ice cream                                  | 4.5  | Frozen pizza                               | 4.3  | Home or ready-made cake                    | 5.6  |
|                      | Lean beef patty                            | 4.4  | Coffee whitener                            | 4.1  | Cheese(other than cottage or cream cheese) | 4.2  |

Abbreviations: AA, arachidonic acid; HPFS, the Health Professionals Follow-Up Study; LA, linoleic acid; NHS, Nurses' Health Study; NHSII, Nurses' Health Study; PUFA, polyunsaturated fatty acids.

\*, Data is not available for 1980 dietary data in NHS, thus 1984 dietary data is presented.

SUPPLEMENTARY DATA

**Supplementary Table S2.** Associations between arachidonic acid and type 2 diabetes risk in NHS, NHSII, and HPFS.\*

|           |                  | Quintiles of fatty acid intake (% energy) |                   |                   |                   |                   |         |
|-----------|------------------|-------------------------------------------|-------------------|-------------------|-------------------|-------------------|---------|
|           |                  | Q1                                        | Q2                | Q3                | Q4                | Q5                | P trend |
| <b>AA</b> |                  |                                           |                   |                   |                   |                   |         |
| NHS       | Median (range)   | 0.05(0.005, 0.06)                         | 0.07(0.06, 0.08)  | 0.08(0.08, 0.09)  | 0.10(0.09, 0.11)  | 0.13(0.11, 0.47)  |         |
|           | Case/person-year | 1421/449219                               | 1652/448937       | 1798/448930       | 2041/448515       | 2463/447788       |         |
|           | Model 1          | 1                                         | 1.17 (1.09, 1.26) | 1.27 (1.19, 1.37) | 1.44 (1.35, 1.54) | 1.73 (1.62, 1.85) | <0.001  |
|           | Model 2          | 1                                         | 1.12 (1.04, 1.20) | 1.14 (1.06, 1.22) | 1.21 (1.13, 1.29) | 1.31 (1.22, 1.40) | <.0001  |
|           | Model 3          | 1                                         | 1.12 (1.04, 1.20) | 1.15 (1.07, 1.23) | 1.23 (1.14, 1.32) | 1.35 (1.25, 1.46) | <.0001  |
|           |                  |                                           |                   |                   |                   |                   |         |
| NHSII     | Median (range)   | 0.04(0, 0.05)                             | 0.06(0.05, 0.07)  | 0.08(0.07, 0.08)  | 0.09(0.08, 0.11)  | 0.13(0.11, 0.55)  |         |
|           | Case/person-year | 766/357258                                | 954/357656        | 1042/357785       | 1168/358006       | 1530/357437       |         |
|           | Model 1          | 1                                         | 1.24 (1.13, 1.36) | 1.33 (1.21, 1.46) | 1.46 (1.33, 1.60) | 1.85 (1.70, 2.02) | <0.001  |
|           | Model 2          | 1                                         | 1.09 (0.99, 1.20) | 1.08 (0.99, 1.19) | 1.10 (1.00, 1.21) | 1.23 (1.12, 1.35) | <0.001  |
|           | Model 3          | 1                                         | 1.08 (0.98, 1.18) | 1.07 (0.97, 1.18) | 1.09 (0.99, 1.19) | 1.21 (1.10, 1.33) | <0.001  |
|           |                  |                                           |                   |                   |                   |                   |         |
| HPFS      | Median (range)   | 0.05(0.004, 0.06)                         | 0.06(0.06, 0.07)  | 0.08(0.07, 0.08)  | 0.09(0.08, 0.10)  | 0.12(0.10, 0.36)  |         |
|           | Case/person-year | 544/180960                                | 692/181187        | 692/181254        | 758/180900        | 921/179939        |         |
|           | Model 1          | 1                                         | 1.25 (1.12, 1.40) | 1.24 (1.11, 1.39) | 1.37 (1.23, 1.53) | 1.64 (1.47, 1.82) | <0.001  |
|           | Model 2          | 1                                         | 1.15 (1.02, 1.29) | 1.09 (0.98, 1.23) | 1.16 (1.03, 1.29) | 1.31 (1.17, 1.46) | <0.001  |
|           | Model 3          | 1                                         | 1.12 (1.00, 1.26) | 1.06 (0.94, 1.19) | 1.11 (0.99, 1.25) | 1.26 (1.12, 1.42) | <0.001  |
|           |                  |                                           |                   |                   |                   |                   |         |
| Pooled†   | Model 2          | 1                                         | 1.10 (1.05, 1.16) | 1.09 (1.04, 1.15) | 1.14 (1.08, 1.20) | 1.25 (1.19, 1.31) | <0.001  |
|           | Model 3          | 1                                         | 1.10 (1.04, 1.15) | 1.09 (1.03, 1.15) | 1.14 (1.08, 1.20) | 1.25 (1.19, 1.32) | <0.001  |

Abbreviations: AA, arachidonic acid; HPFS, the Health Professionals Follow-Up Study; NHS, Nurses' Health Study; NHSII, Nurses' Health Study II; PUFA, polyunsaturated fatty acids; SFA, saturated fatty acid.

\* Hazard ratios were calculated in Cox proportional hazards model; Model 1, adjusted for age. Model 2, further adjusted for ethnicity (Caucasian, African American, Asian, and other ethnicity), smoking status (never, former, current (1–14, 15–24, or ≥25 cigarettes/day), or missing), alcohol intake (gram/day: 0, 0.1–4.9, 5.0–14.9, and >15.0 in women, 0, 0.1–4.9, 5.0–29.9, and >30.0 in men, or missing), family history of diabetes (yes/no), menopausal status and post-menopausal hormone use (pre-menopause, post-menopause (never, former, or current hormone use), or missing, for women), physical activity (<3, 3.0–8.9, 9.0–17.9, 18.0–26.9, ≥27.0 metabolic equivalent of task hours/week, or missing), multivitamin use (yes/no), baseline hypertension, baseline hypercholesterolemia, updated body mass index (<23, 23–24.9, 25–29.9, 30–34.9, >35kg/m<sup>2</sup>, or missing), total energy intake, and fruits and vegetables. Model 3, further adjusted for total fats, trans fats, monounsaturated fats, and other PUFAs.

† Study estimates from three cohorts were pooled using a fixed effects model.

SUPPLEMENTARY DATA

**Supplementary Table S3.** Hazard ratios of type 2 diabetes using linoleic acid to substitute for energy from other macronutrients by further adjusting incident hypertension and hypercholesterolemia.\*

|               | Hazard ratio of type 2 diabetes |          |                   |          |                   |          | P for heterogeneity |          |      |
|---------------|---------------------------------|----------|-------------------|----------|-------------------|----------|---------------------|----------|------|
|               | NHS                             | <i>P</i> | NHSII             | <i>P</i> | HPFS              | <i>P</i> | Pooled†             | <i>P</i> |      |
| SFAs          | 0.92 (0.81, 1.03)               | 0.16     | 0.84 (0.68, 1.03) | 0.09     | 0.74 (0.62, 0.90) | 0.002    | 0.86 (0.79, 0.95)   | 0.002    | 0.15 |
| Trans fats    | 0.84 (0.73, 0.97)               | 0.02     | 0.95 (0.80, 1.13) | 0.55     | 0.82 (0.68, 1.00) | 0.05     | 0.86 (0.78, 0.95)   | 0.002    | 0.42 |
| MUFAs         | 0.97 (0.81, 1.16)               | 0.75     | 0.78 (0.60, 1.00) | 0.05     | 0.93 (0.69, 1.26) | 0.66     | 0.90 (0.79, 1.02)   | 0.11     | 0.43 |
| n-3 PUFA      | 1.44 (0.95, 2.19)               | 0.08     | 0.90 (0.53, 1.55) | 0.71     | 0.80 (0.50, 1.28) | 0.35     | 0.99 (0.75, 1.30)   | 0.93     | 0.38 |
| Carbohydrates | 0.94 (0.82, 1.07)               | 0.33     | 0.86 (0.71, 1.05) | 0.13     | 0.94 (0.77, 1.14) | 0.52     | 0.91 (0.83, 1.00)   | 0.05     | 0.80 |

Abbreviations: HPFS, the Health Professionals Follow-Up Study; NHS, Nurses' Health Study; NHSII, Nurses' Health Study II; PUFA, polyunsaturated fatty acids; MUFA, monounsaturated fatty acids; SFA, saturated fatty acid.

\* Hazard ratios were calculated in Cox proportional hazards mode after adjusting for age, ethnicity (Caucasian, African American, Asian, and other ethnicity), smoking status (never, former, current (1–14, 15–24, or ≥25 cigarettes/day), or missing), alcohol intake (gram/day: 0, 0.1–4.9, 5.0–14.9, and >15.0 in women, 0, 0.1–4.9, 5.0–29.9, and >30.0 in men, or missing), family history of diabetes (yes/no), menopausal status and post-menopausal hormone use (pre-menopause, post-menopause (never, former, or current hormone use), or missing, for women), physical activity (<3, 3.0–8.9, 9.0–17.9, 18.0–26.9, ≥27.0 metabolic equivalent of task hours/week, or missing), current aspirin use (yes/no), multivitamin use (yes/no), incident hypertension, incident hypercholesterolemia, updated body mass index (<23, 23–24.9, 25–29.9, 30–34.9, >35kg/m<sup>2</sup>, or missing), total energy intake, and fruits and vegetables; for fat-fat substitution, further adjusted for other fats and total fats; for carbohydrate substitution, further adjusted for energy from protein.

† Study estimates from three cohorts were pooled using a fixed effects model.

SUPPLEMENTARY DATA

**Supplementary Table S4.** Hazard ratios of type 2 diabetes using linoleic acid to substitute for energy from other macronutrients by using two most recent dietary data.\*

|               | Hazard ratio of type 2 diabetes |          |                   |          |                   |          |                   |          | P for heterogeneity |
|---------------|---------------------------------|----------|-------------------|----------|-------------------|----------|-------------------|----------|---------------------|
|               | NHS                             | <i>P</i> | NHSII             | <i>P</i> | HPFS              | <i>P</i> | Pooled†           | <i>P</i> |                     |
| SFAs          | 0.94 (0.85, 1.04)               | 0.22     | 0.86 (0.73, 1.02) | 0.09     | 0.80 (0.67, 0.95) | 0.010    | 0.89 (0.83, 0.96) | 0.004    | 0.26                |
| Trans fats    | 0.87 (0.78, 0.97)               | 0.009    | 0.89 (0.78, 1.02) | 0.10     | 0.87 (0.75, 1.02) | 0.08     | 0.88 (0.81, 0.94) | <0.001   | 0.96                |
| MUFAs         | 0.96 (0.84, 1.10)               | 0.53     | 0.81 (0.66, 0.99) | 0.04     | 0.92 (0.72, 1.18) | 0.51     | 0.91 (0.82, 1.01) | 0.07     | 0.39                |
| n-3 PUFA      | 1.10 (0.83, 1.44)               | 0.52     | 0.97 (0.65, 1.43) | 0.87     | 0.84 (0.57, 1.23) | 0.37     | 0.99 (0.82, 1.21) | 0.95     | 0.53                |
| Carbohydrates | 0.97 (0.87, 1.07)               | 0.50     | 0.87 (0.74, 1.01) | 0.07     | 0.96 (0.81, 1.13) | 0.63     | 0.94 (0.87, 1.01) | 0.11     | 0.51                |

Abbreviations: HPFS, the Health Professionals Follow-Up Study; NHS, Nurses' Health Study; NHSII, Nurses' Health Study II; PUFA, polyunsaturated fatty acids; MUFA, monounsaturated fatty acids; SFA, saturated fatty acid.

\* Hazard ratios were calculated in Cox proportional hazards mode after adjusting for age, ethnicity (Caucasian, African American, Asian, and other ethnicity), smoking status (never, former, current (1–14, 15–24, or ≥25 cigarettes/day), or missing), alcohol intake (gram/day: 0, 0.1–4.9, 5.0–14.9, and >15.0 in women, 0, 0.1–4.9, 5.0–29.9, and >30.0 in men, or missing), family history of diabetes (yes/no), menopausal status and post-menopausal hormone use (pre-menopause, post-menopause (never, former, or current hormone use), or missing, for women), physical activity (<3, 3.0–8.9, 9.0–17.9, 18.0–26.9, ≥27.0 metabolic equivalent of task hours/week, or missing), current aspirin use (yes/no), multivitamin use (yes/no), baseline hypertension, baseline hypercholesterolemia, updated body mass index (<23, 23–24.9, 25–29.9, 30–34.9, >35kg/m<sup>2</sup>, or missing), total energy intake, and fruits and vegetables; for fat-fat substitution, further adjusted for other fats and total fats; for carbohydrate substitution, further adjusted for energy from protein.

† Study estimates from three cohorts were pooled using a fixed effects model.

SUPPLEMENTARY DATA

**Supplementary Table S5.** Hazard ratios of type 2 diabetes using LA to substitute for energy from other macronutrients by using baseline dietary data.\*

|               | Hazard ratio of type 2 diabetes |          |                   |          |                   |          |                   |          | P for heterogeneity |
|---------------|---------------------------------|----------|-------------------|----------|-------------------|----------|-------------------|----------|---------------------|
|               | NHS                             | <i>P</i> | NHSII             | <i>P</i> | HPFS              | <i>P</i> | Pooled†           | <i>P</i> |                     |
| SFAs          | 0.93 (0.82, 1.05)               | 0.25     | 0.93 (0.79, 1.09) | 0.35     | 0.77 (0.66, 0.90) | 0.001    | 0.94 (0.88, 1.02) | 0.12     | 0.009               |
| Trans fats    | 0.83 (0.72, 0.96)               | 0.01     | 0.96 (0.84, 1.11) | 0.60     | 0.96 (0.88, 1.05) | 0.39     | 0.96 (0.90, 1.02) | 0.21     | 0.99                |
| MUFAs         | 0.95 (0.80, 1.14)               | 0.59     | 0.71 (0.56, 0.90) | 0.005    | 0.88 (0.71, 1.09) | 0.23     | 0.90 (0.82, 0.99) | 0.03     | 0.08                |
| n-3 PUFA      | 1.23 (0.81, 1.87)               | 0.34     | 0.71 (0.46, 1.11) | 0.13     | 1.00 (0.91, 1.09) | 0.97     | 0.97 (0.89, 1.06) | 0.56     | 0.10                |
| Carbohydrates | 0.92 (0.81, 1.05)               | 0.22     | 0.84 (0.72, 0.99) | 0.04     | 0.83 (0.70, 0.99) | 0.03     | 0.89 (0.83, 0.96) | 0.002    | 0.39                |

Abbreviations: HPFS, the Health Professionals Follow-Up Study; NHS, Nurses' Health Study; NHSII, Nurses' Health Study II; PUFA, polyunsaturated fatty acids; MUFA, monounsaturated fatty acids; SFA, saturated fatty acid.

\* Hazard ratios were calculated in Cox proportional hazards mode after adjusting for age, ethnicity (Caucasian, African American, Asian, and other ethnicity), smoking status (never, former, current (1–14, 15–24, or ≥25 cigarettes/day), or missing), alcohol intake (gram/day: 0, 0.1–4.9, 5.0–14.9, and >15.0 in women, 0, 0.1–4.9, 5.0–29.9, and >30.0 in men, or missing), family history of diabetes (yes/no), menopausal status and post-menopausal hormone use (pre-menopause, post-menopause (never, former, or current hormone use), or missing, for women), physical activity (<3, 3.0–8.9, 9.0–17.9, 18.0–26.9, ≥27.0 metabolic equivalent of task hours/week, or missing), current aspirin use (yes/no), multivitamin use (yes/no), baseline hypertension, baseline hypercholesterolemia, updated body mass index (<23, 23–24.9, 25–29.9, 30–34.9, >35kg/m<sup>2</sup>, or missing), total energy intake, and fruits and vegetables; for fat-fat substitution, further adjusted for other fats and total fats; for carbohydrate substitution, further adjusted for energy from protein.

† Study estimates from three cohorts were pooled using a fixed effects model.
